# Supplementary material for: Safety and efficacy of CRISPR-based non-viral PD1 locus specifically integrated anti-CD19 CAR-T cells in patients with relapsed or refractory Non-Hodgkin's lymphoma: a first-in-human phase I study
Source: PubMed Central journal article supplement — eClinicalMedicine. 2023 May 18;60:102010. doi: 10.1016/j.eclinm.2023.102010 (PMC10209187; doi:10.1016/j.eclinm.2023.102010), 2023-05-18
Supplement: mmc1.pdf [file mmc1.pdf]

# Supplementary Materials

## Table of contents

|                                                                                                                                                        |          |
|--------------------------------------------------------------------------------------------------------------------------------------------------------|----------|
| <b>SUPPLEMENTARY FIGURES</b> .....                                                                                                                     | <b>2</b> |
| SUPPLEMENTARY FIGURE 1. THE DYNAMIC FLUCTUATION OF CYTOKINES IN REPRESENTATIVE PATIENTS WITH OR WITHOUT CRS .....                                      | 2        |
| SUPPLEMENTARY FIGURE 2. PROGRESSION-FREE SURVIVAL AND OVERALL SURVIVAL IN DIFFERENT GROUPS OF PATIENTS (NO STATISTICAL SIGNIFICANCE WAS OBSERVED)..... | 3        |
| SUPPLEMENTARY FIGURE 3. PEAK CAR-T CELL EXPOSURE IN DIFFERENT GROUPS OF PATIENTS (NO STATISTICAL SIGNIFICANCE WAS OBSERVED). .....                     | 4        |
| SUPPLEMENTARY FIGURE 4. PFS IS NOT ASSOCIATED WITH PROLONGED B CELL APLASIA (NO STATISTICAL SIGNIFICANCE WAS OBSERVED). .....                          | 5        |
| <b>SUPPLEMENTARY TABLES</b> .....                                                                                                                      | <b>6</b> |
| SUPPLEMENTARY TABLE 1. BASELINE CHARACTERISTICS, RESPONSES, AND TOXICITIES OF EACH PATIENT.....                                                        | 6        |

# Supplementary Figures

## Supplementary Figure 1. The Dynamic Fluctuation of Cytokines in Representative Patients with or without CRS

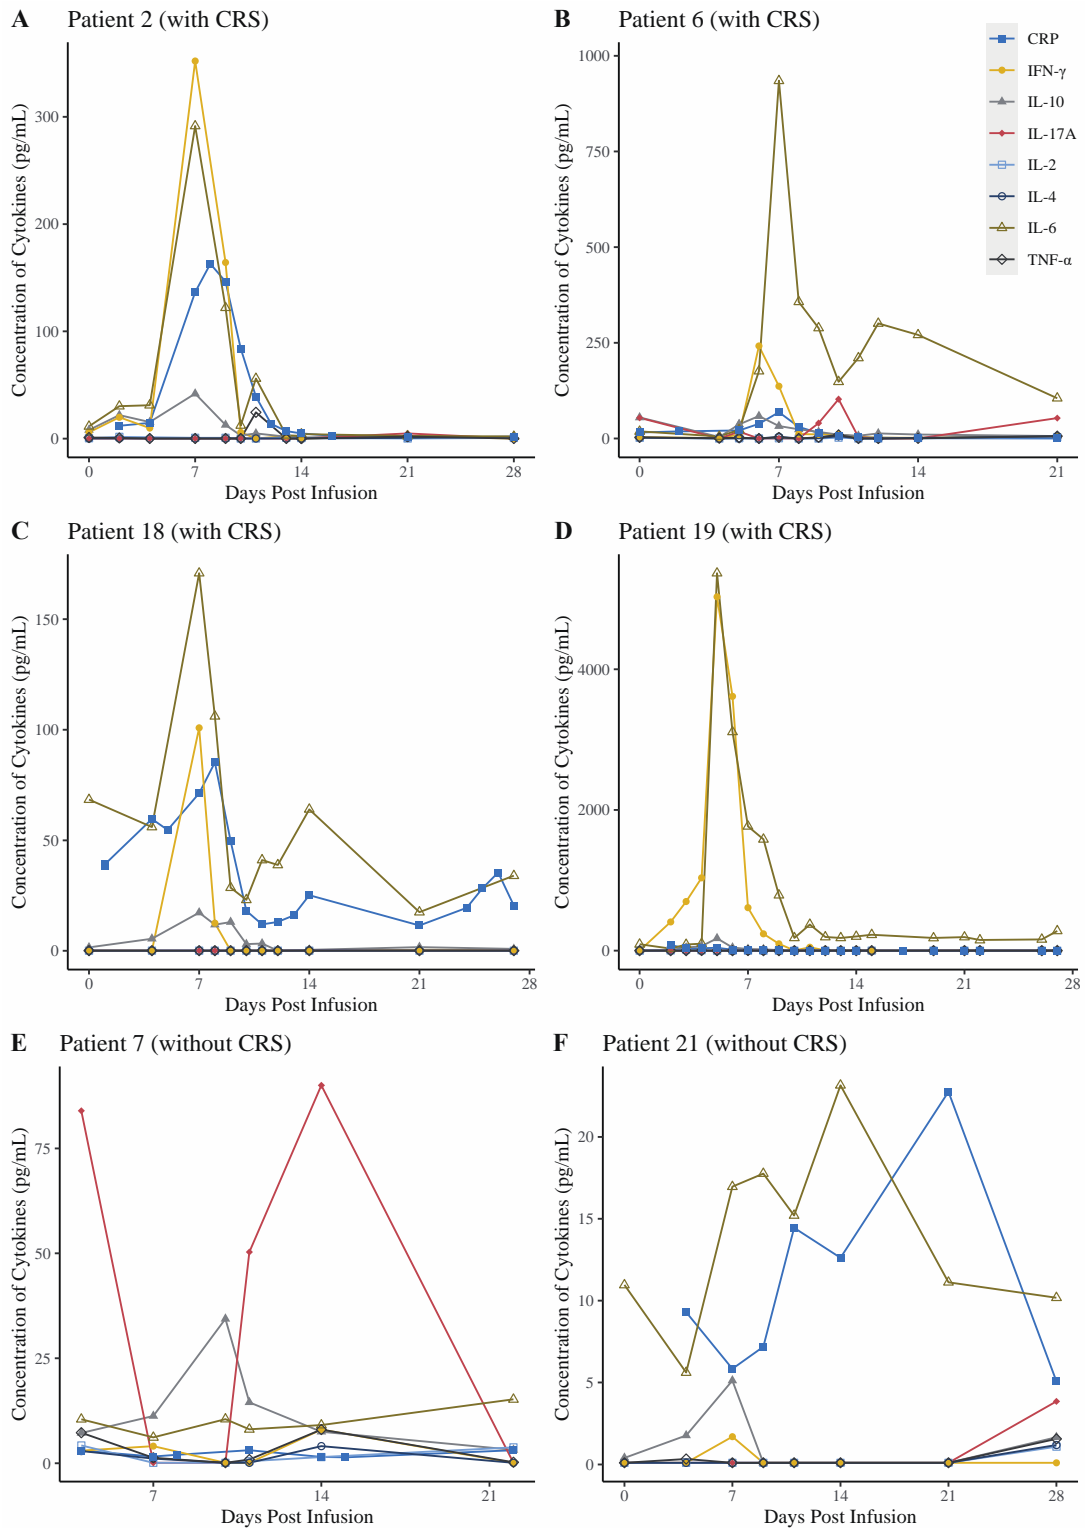

## Supplementary Figure 2. Progression-Free Survival and Overall Survival in Different Groups of Patients (No statistical significance was observed).

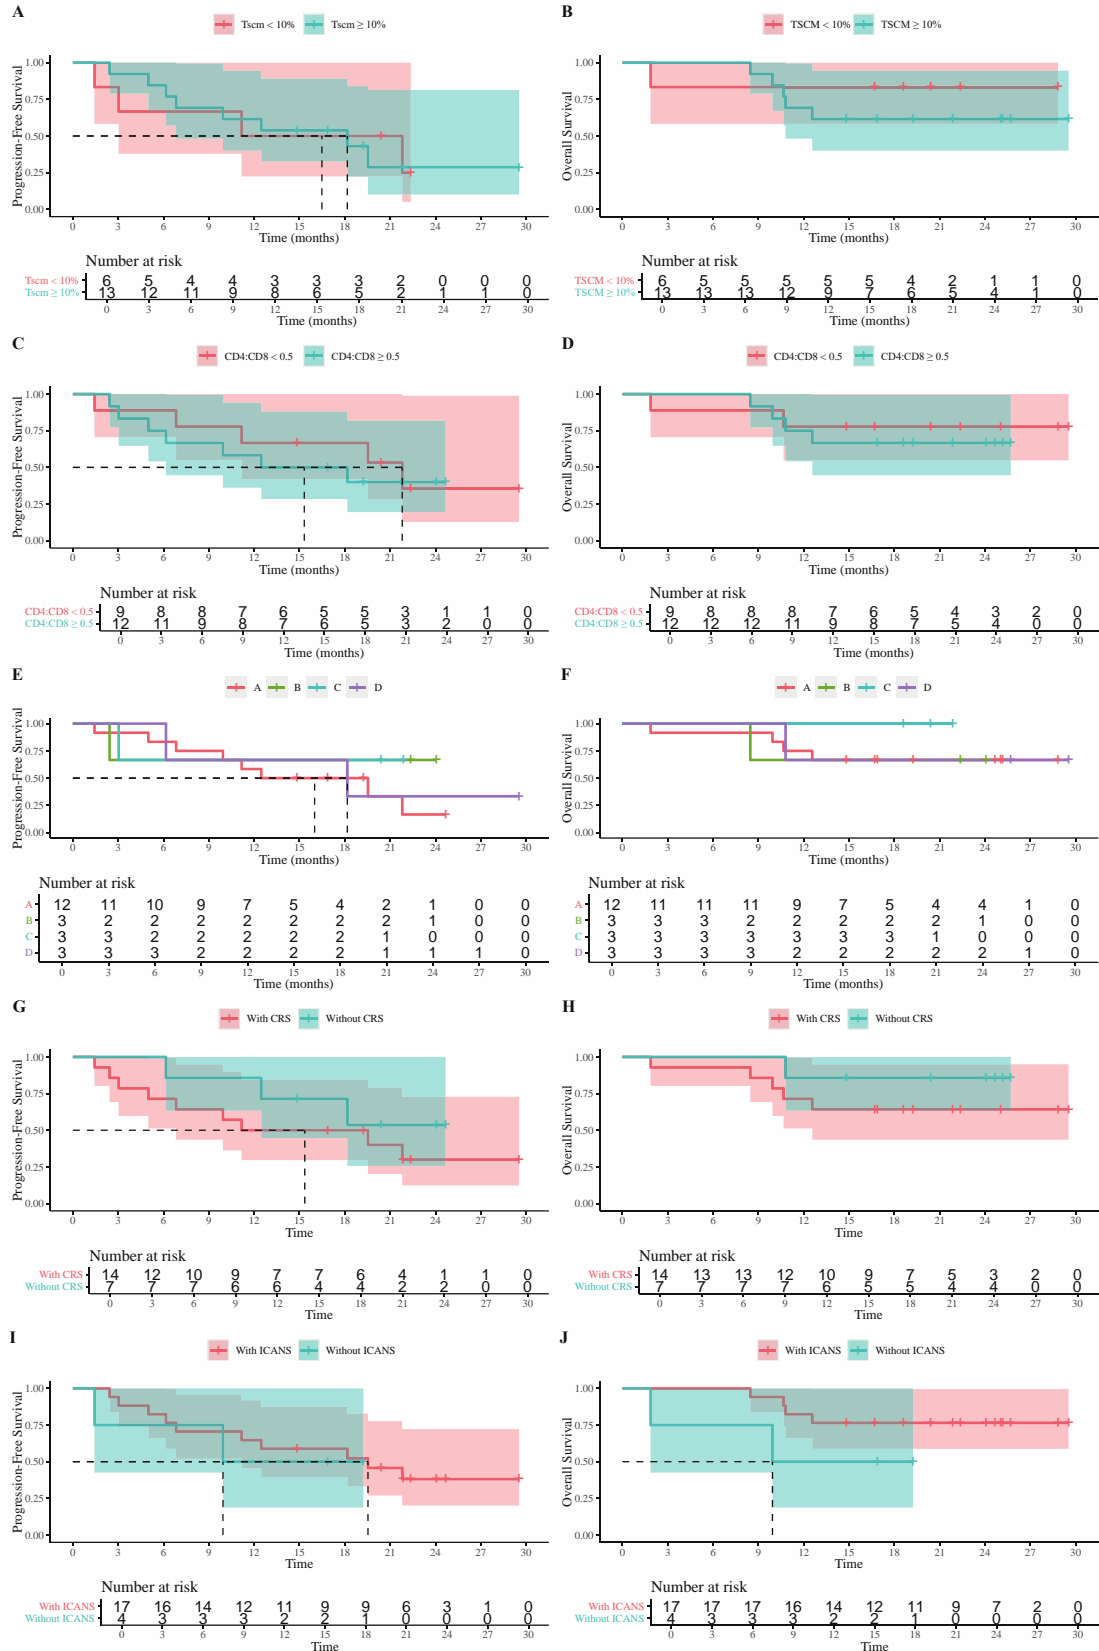

**Supplementary Figure 3. Peak CAR-T cell Exposure in Different Groups of Patients (No statistical significance was observed).**

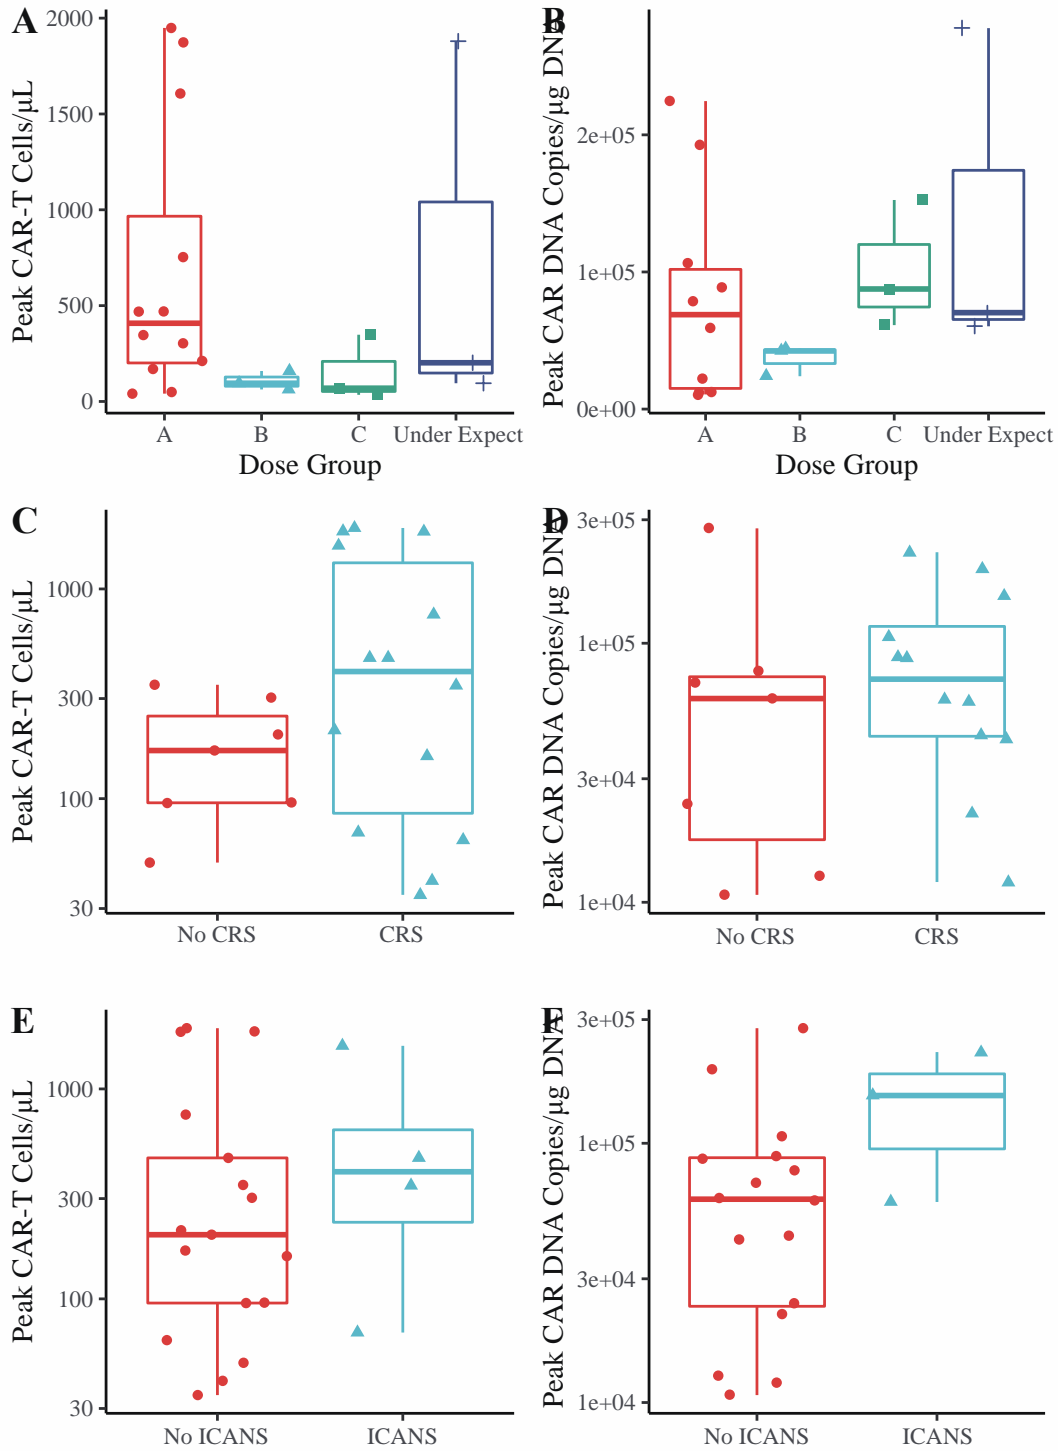

**Supplementary Figure 4. PFS is not associated with prolonged B cell aplasia (No statistical significance was observed).**

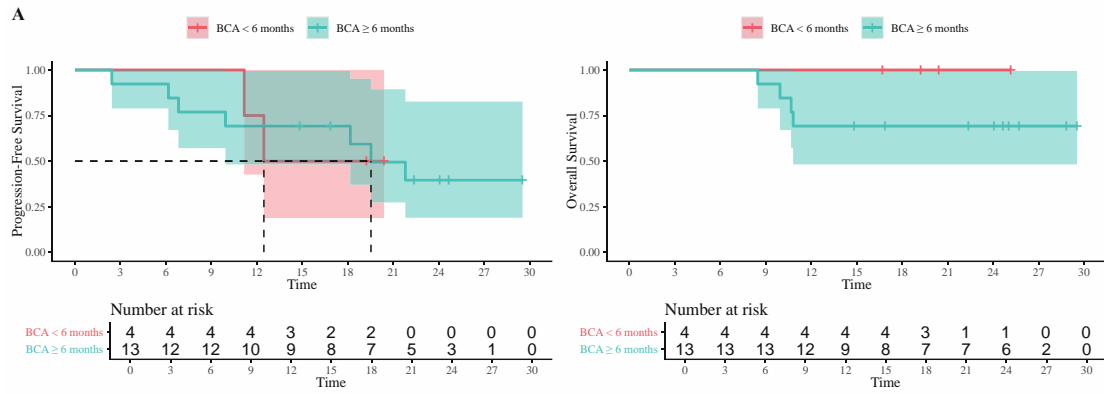

## Supplementary Tables

**Supplementary Table 1. Baseline Characteristics, Responses, and Toxicities of Each Patient.**

| Patient ID | Age (yr.) | Sex    | Disease Type | Disease Stage* | Risk Stratification <sup>§</sup> | PD-L1 Expression (%) | Prior Therapies              | CAR-T Dose ( $\times 10^6$ /kg) | Dose Group | Best Response | PFS (days) | OS (days) | CRS <sup>‡</sup> | ICANS <sup>¶</sup> |
|------------|-----------|--------|--------------|----------------|----------------------------------|----------------------|------------------------------|---------------------------------|------------|---------------|------------|-----------|------------------|--------------------|
| 1          | 44        | Male   | DLBCL        | 4              | High intermediate                | 80                   | 6 (including PD-1/PD-L1 mAb) | 0.56                            | D          | CR            | 886        | 886       | Grade 1          | None               |
| 2          | 53        | Male   | DLBCL        | 3              | High intermediate                | 10                   | 4                            | 2.04                            | A          | CR            | 654        | 865       | Grade 1          | None               |
| 3          | 59        | Male   | DLBCL        | 4              | High intermediate                | 80                   | 3                            | 1.95                            | A          | PR            | 52         | 377       | Grade 1          | None               |
| 4          | 46        | Male   | DLBCL        | 4              | High intermediate                | 5                    | 9 (including auto-HSCT)      | 0.80                            | D          | CR            | 545        | 771       | None             | None               |
| 5          | 43        | Female | B-LBL        | 4              | Poor risk                        | 5                    | 4                            | 0.76                            | D          | CR            | 185        | 324       | None             | None               |
| 6          | 64        | Female | DLBCL        | 4              | High                             | 2                    | 5                            | 2.35                            | A          | CR            | 586        | 751       | Grade 2          | None               |
| 7          | 62        | Female | DLBCL        | 3              | High intermediate                | 15                   | 1                            | 2.15                            | A          | CR            | 374        | 755       | None             | None               |
| 8          | 51        | Female | FL           | 4              | High                             | 5                    | 5                            | 2.00                            | A          | CR            | 740        | 740       | None             | None               |
| 9          | 56        | Male   | MCL          | 2              | High                             | Negative             | 3                            | 4.00                            | B          | CR            | 722        | 722       | None             | None               |
| 10         | 36        | Female | DLBCL        | 4              | High intermediate                | Negative             | 3                            | 4.40                            | B          | PR            | 73         | 254       | Grade 1          | None               |
| 11         | 36        | Male   | DLBCL        | 4              | Low intermediate                 | Not available        | 4                            | 4.00                            | B          | CR            | 671        | 671       | Grade 1          | None               |
| 12         | 57        | Female | DLBCL        | 4              | High intermediate                | Not available        | 5                            | 5.40                            | C          | CR            | 656        | 656       | None             | None               |
| 13         | 34        | Female | DLBCL        | 2              | Low                              | Negative             | 5                            | 6.10                            | C          | CR            | 91         | 558       | Grade 1          | None               |
| 14         | 68        | Male   | DLBCL        | 4              | High                             | 60                   | 3                            | 5.20                            | C          | CR            | 612        | 612       | None             | Grade 1            |
| 15         | 67        | Female | DLBCL        | 4              | High                             | Not available        | 5                            | 2.60                            | A          | PR            | 577        | 577       | None             | None               |

|    |    |        |            |   |                   |               |                                            |      |   |    |     |     |         |      |
|----|----|--------|------------|---|-------------------|---------------|--------------------------------------------|------|---|----|-----|-----|---------|------|
| 16 | 47 | Male   | DLBCL      | 4 | High intermediate | 5             | 8 (including auto-HSCT and PD-1/PD-L1 mAb) | 1.60 | A | CR | 335 | 501 | Grade 1 | None |
| 17 | 62 | Male   | MCL        | 3 | Intermediate      | Not available | 6                                          | 1.80 | A | CR | 506 | 506 | Grade 1 | None |
| 18 | 70 | Male   | DLBCL      | 4 | High intermediate | Negative      | 2                                          | 2.00 | A | CR | 298 | 298 | Grade 1 | None |
| 19 | 53 | Female | DLBCL      | 4 | High intermediate | Negative      | 9                                          | 1.96 | A | PR | 43  | 56  | Grade 2 | None |
| 20 | 61 | Female | PCNS DLBCL | 3 | High              | Negative      | 5                                          | 1.94 | A | CR | 205 | 320 | Grade 1 | None |
| 21 | 64 | Male   | DLBCL      | 3 | High              | 70            | 3                                          | 1.67 | A | CR | 445 | 445 | None    | None |

\*Staged as per Ann-Arbor Staging System pretreatment.<sup>51</sup>

§Stratified as per IPI, aalPI, MIPI, FLIPI score, or NCCN guideline for ALL pre-treatment.<sup>25,26,28,52</sup>

†Graded according to the criteria of Lee *et al.*<sup>22</sup> and American Society for Transplantation and Cellular Therapy consensus grading.<sup>23</sup>

¶Graded according to the criteria of American Society for Transplantation and Cellular Therapy consensus grading<sup>23</sup>.

Abbreviations: yr., year(s); DLBCL, diffuse large B cell lymphoma; MCL, mantle cell lymphoma; B-LBL, B-lymphoblastic lymphoma; FL, follicular lymphoma; PCNS DLBCL, primary central nervous system DLBCL; IPI, international prognostic index; MIPI, mantle cell lymphoma IPI; aalPI, age-adjusted IPI; FLIPI, follicular lymphoma IPI; PFS, progression-free survival; OS, overall survival; CRS, cytokine release syndrome; ICANS, immune effector cell-associated neurotoxicity syndrome; PD-1, programmed cell death protein 1; PD-L1, programmed death-ligand 1; HSCT, hematopoietic stem cell transplantation; mAb, monoclonal antibody; CR, complete response; PR, partial response; NCCN, National Comprehensive Cancer Network; ALL, acute lymphoblastic leukemia.
